# Supplementary material for: Bimodal age distribution at diagnosis in breast cancer persists across molecular and genomic classifications
Source: Springer Nature journal article supplement (doi:10.1007/s10549-019-05442-2), 2019-09-18

**All cases with ER (n=2860)**

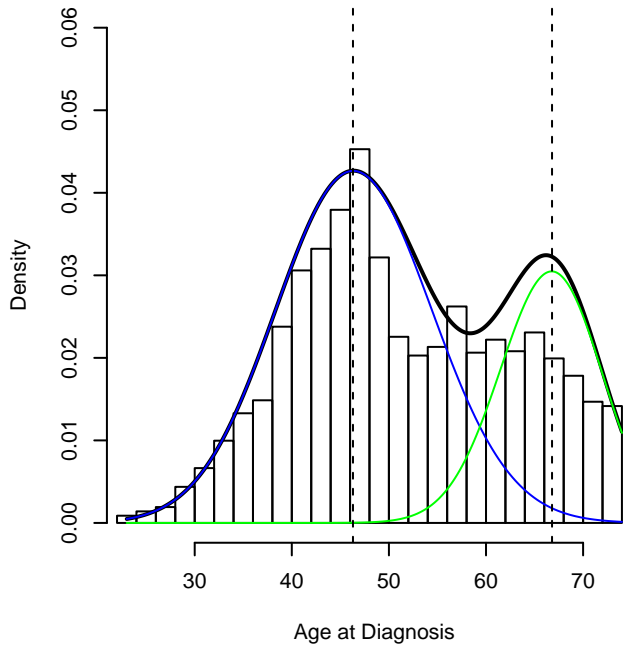

**ER < 1% (n=757)**

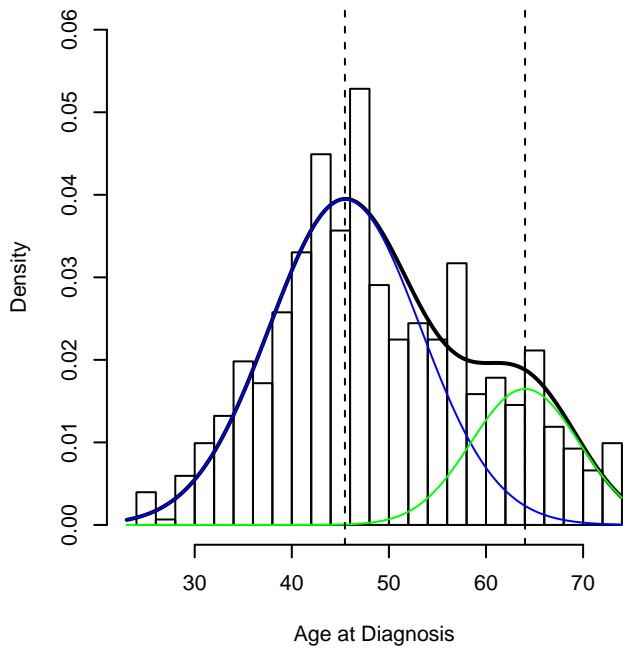

**ER >= 1% (n=2103)**

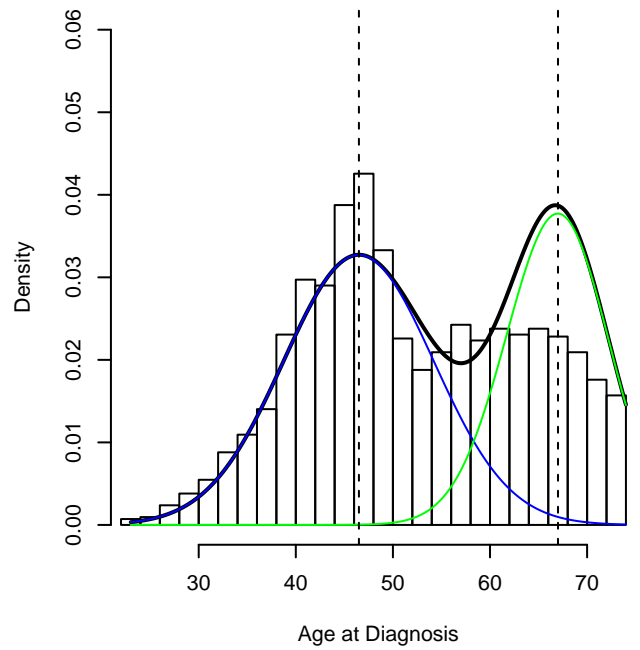

**ER <10% (n=974)**

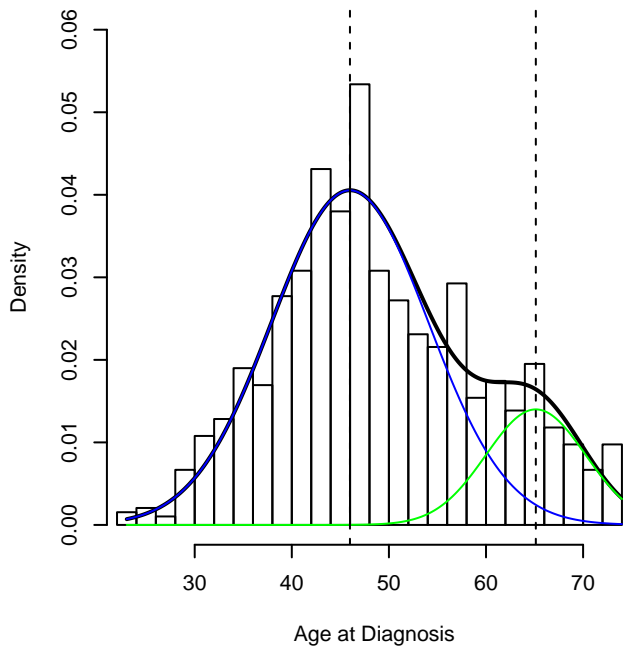

**ER >= 10% (n=1886)**

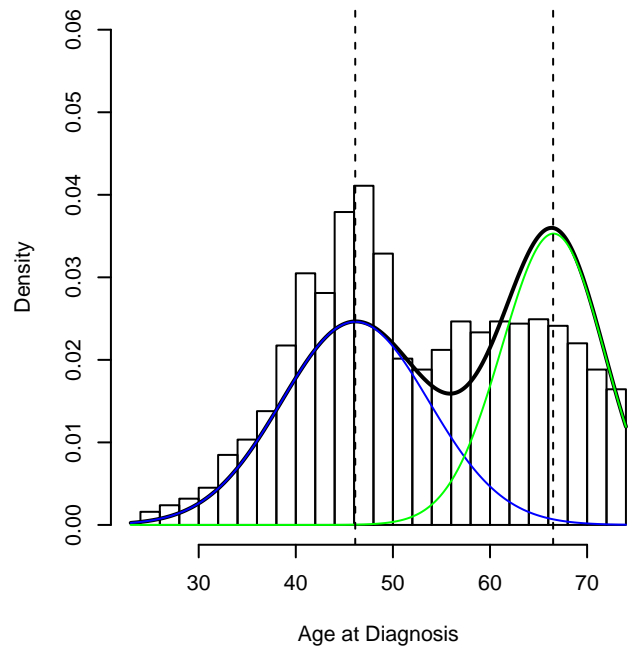

Supplement: MOESM5 [file 17185084]
