# Supplementary material for: Bimodal age distribution at diagnosis in breast cancer persists across molecular and genomic classifications
Source: Springer Nature journal article supplement (doi:10.1007/s10549-019-05442-2), 2019-09-18

**All cases with ER (n=1510)**

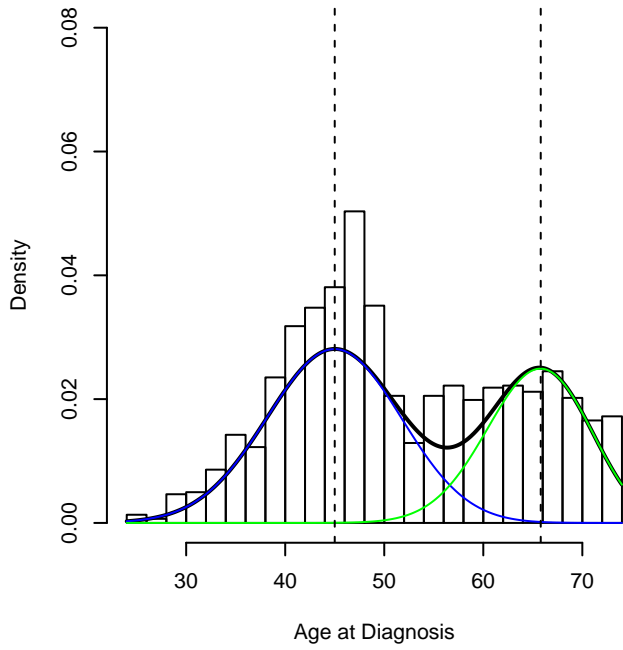

**ER < 1% (n=288)**

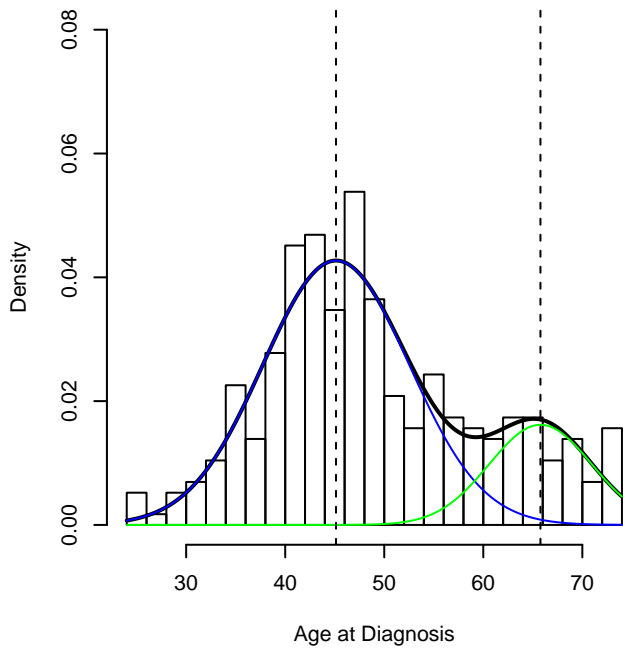

**ER >= 1% (n=1222)**

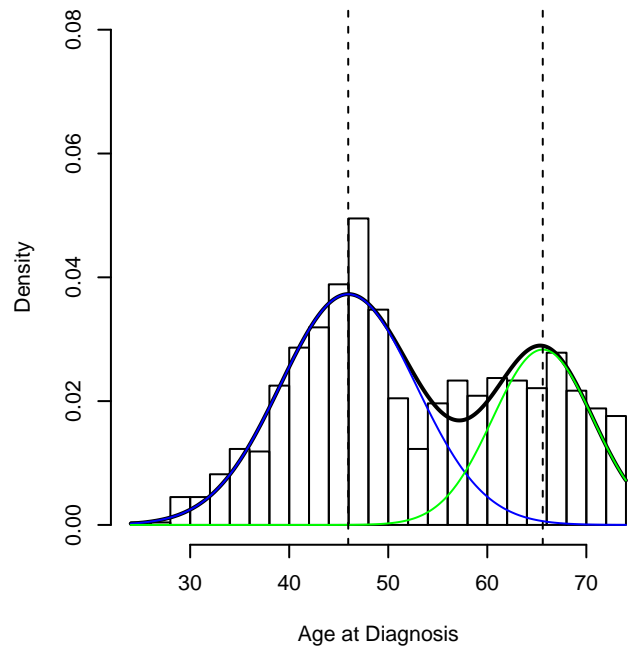

**ER < 10% (n=406)**

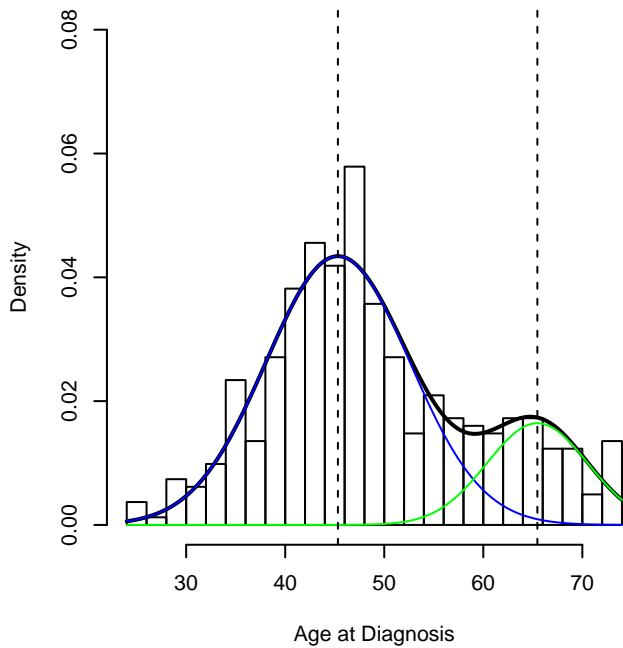

**ER >= 10% (n=1104)**

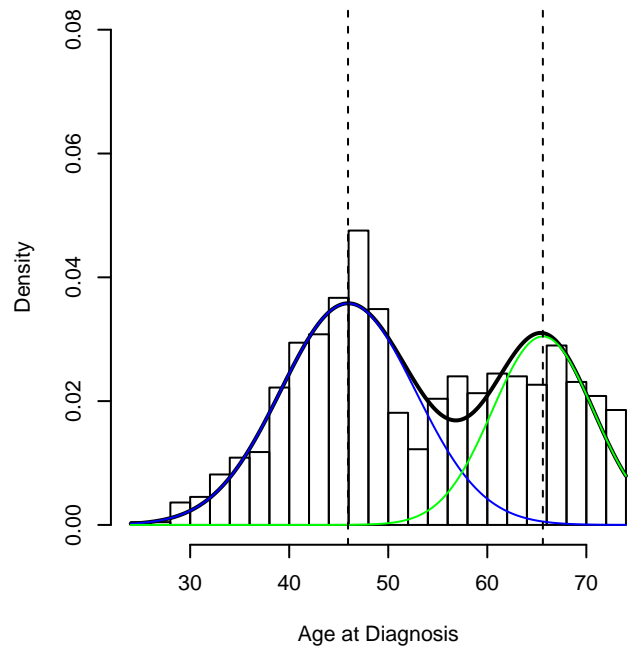

Supplement: MOESM6 [file 17185084]
