# Supplementary material for: Bimodal age distribution at diagnosis in breast cancer persists across molecular and genomic classifications
Source: Springer Nature journal article supplement (doi:10.1007/s10549-019-05442-2), 2019-09-18

**All cases with ER (n=1350)**

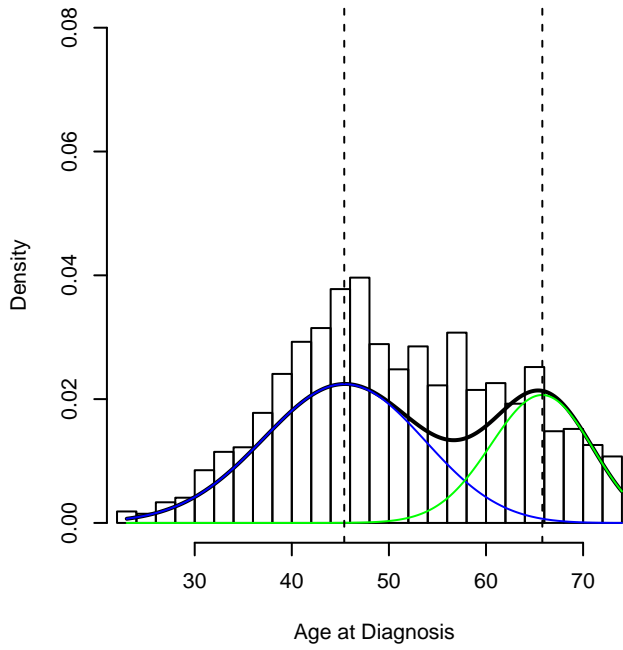

**ER < 1% (n=469)**

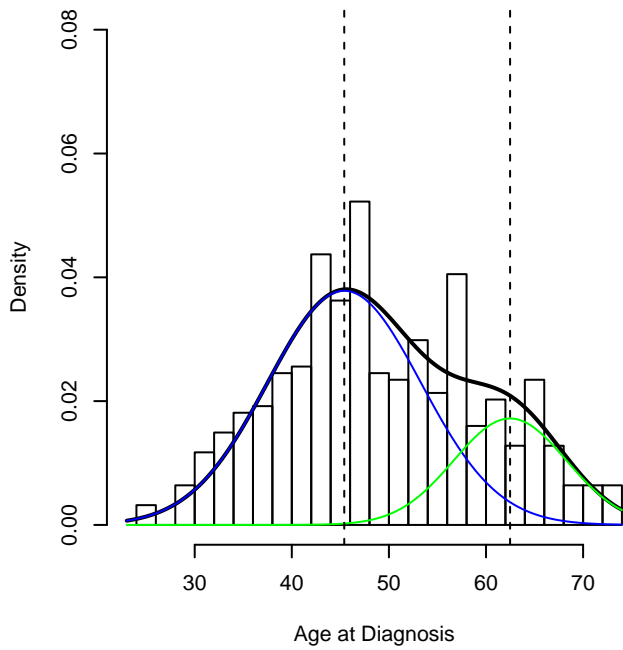

**ER >= 1% (n=881)**

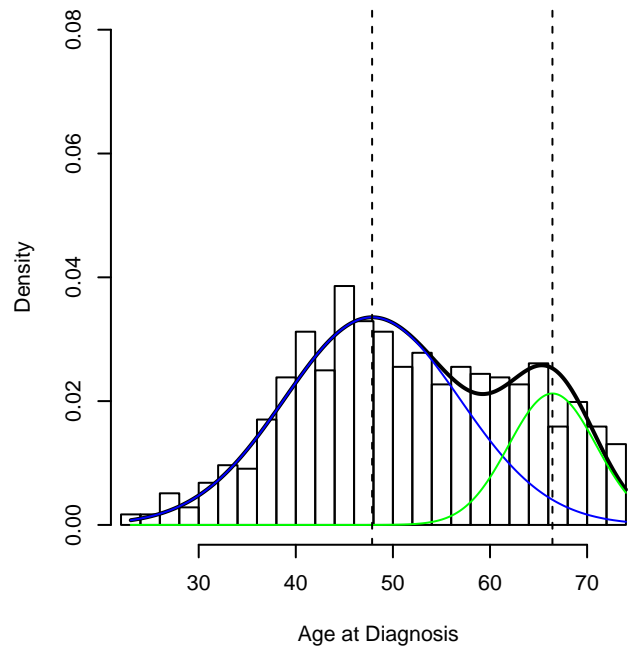

**ER <10% (n=568)**

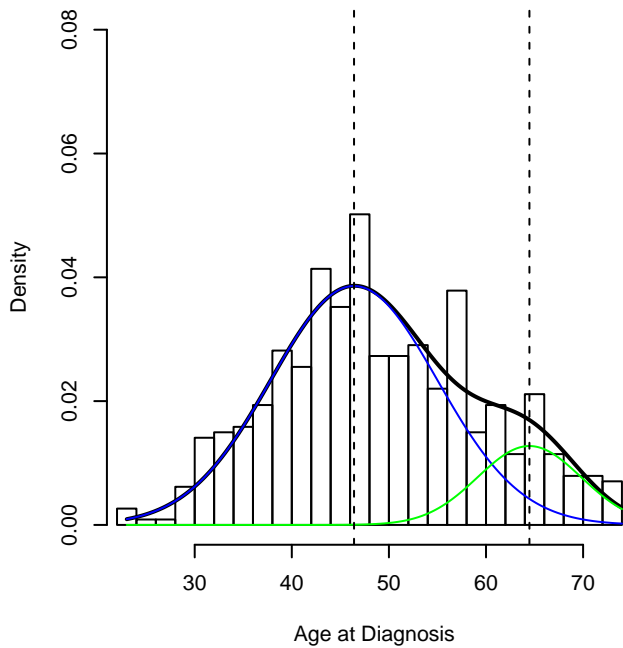

**ER >= 10% (n=782)**

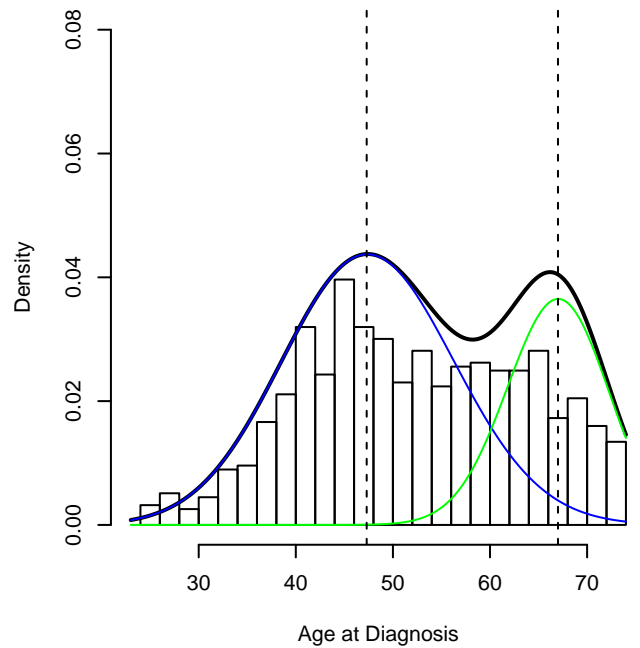

Supplement: MOESM7 [file 17185084]
