# Supplementary material for: Bimodal age distribution at diagnosis in breast cancer persists across molecular and genomic classifications
Source: Springer Nature journal article supplement (doi:10.1007/s10549-019-05442-2), 2019-09-18

**Luminal A (n=3292)**

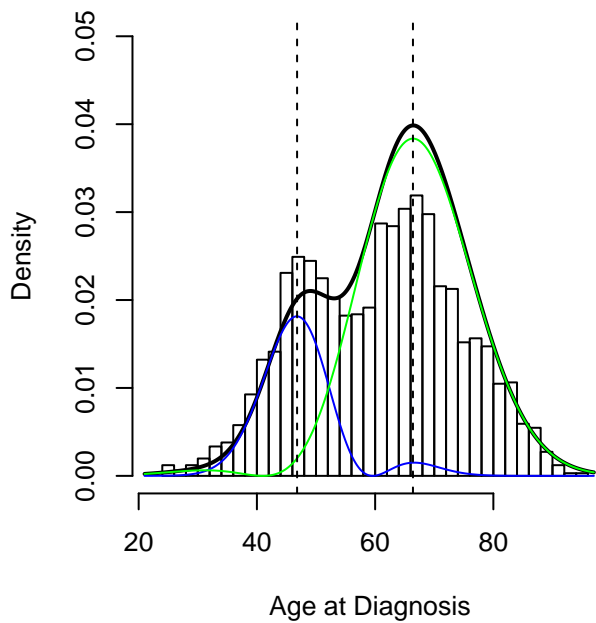

**Luminal B (n=1750)**

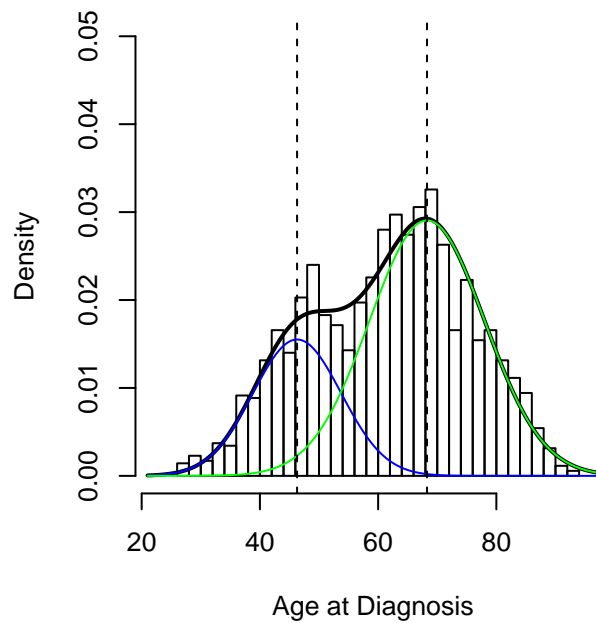

**Her2-enriched (n=917)**

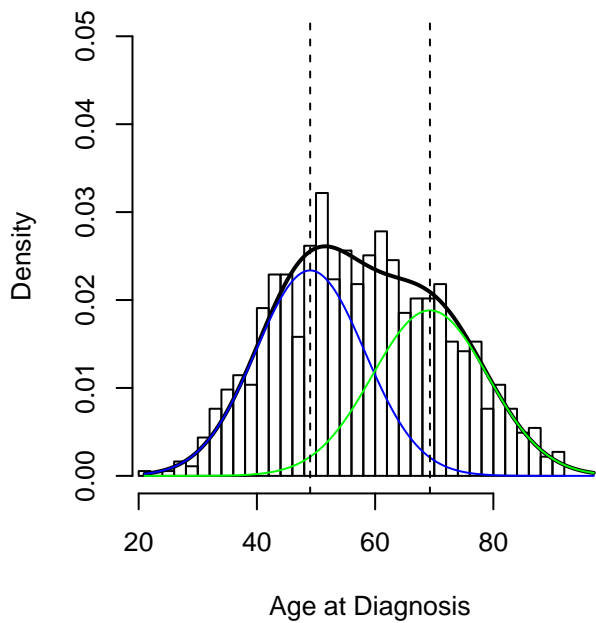

**Basal-like (n=1411)**

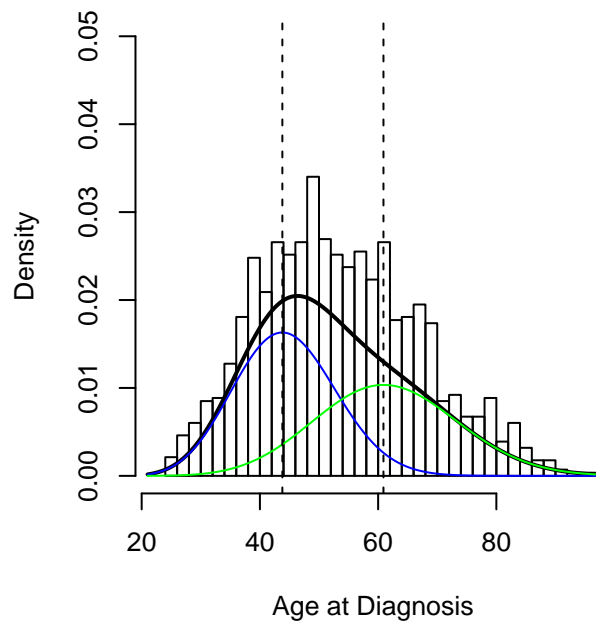

Supplement: MOESM8 [file 17185084]
