# Supplementary material for: Bimodal age distribution at diagnosis in breast cancer persists across molecular and genomic classifications
Source: Springer Nature journal article supplement (doi:10.1007/s10549-019-05442-2), 2019-09-18

**Combined grade 1 (n=718)**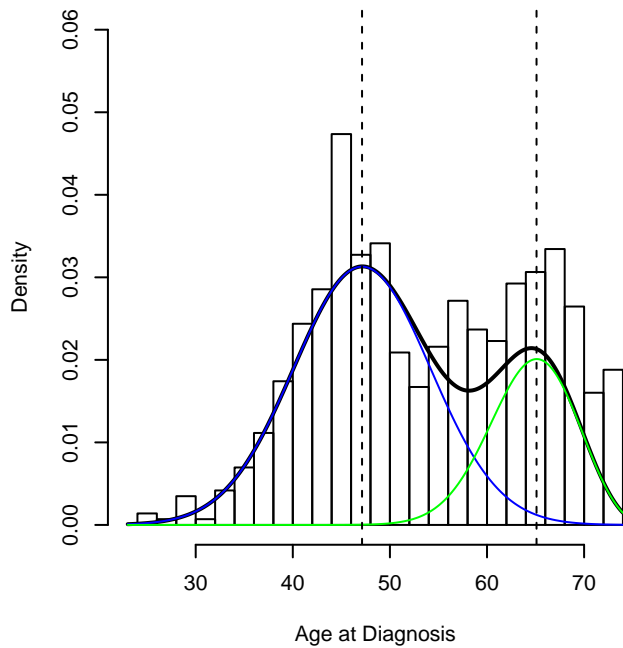**Combined grade 2 (n=1243)**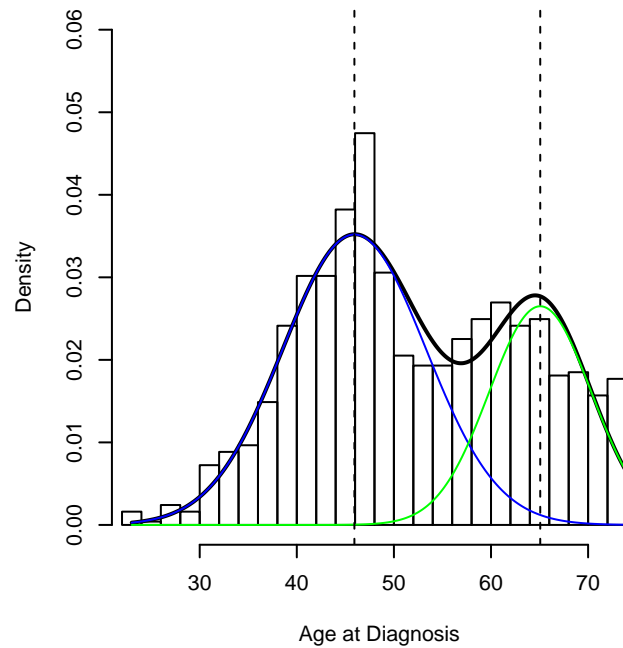**Combined grade 3 (n=1447)**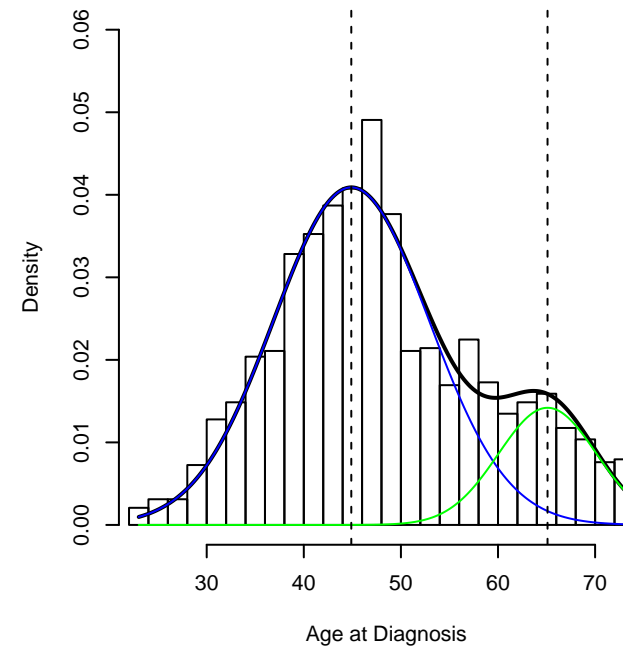**Tumor size <=2 cm (n=2422)**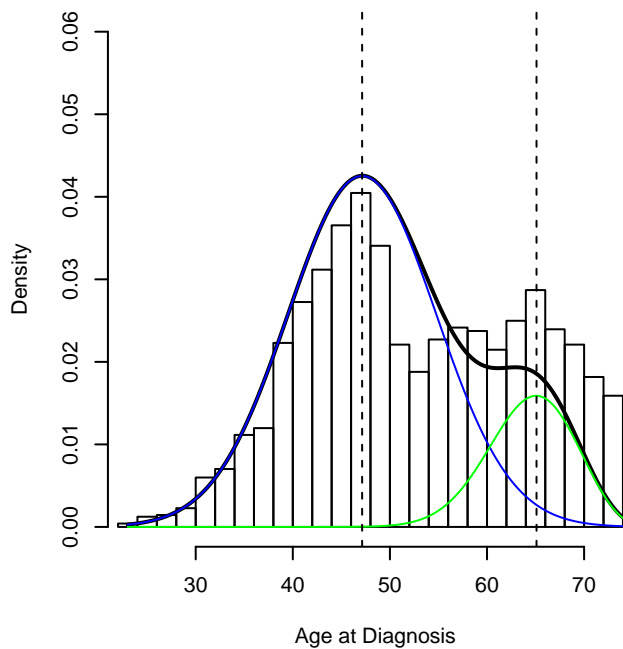**Tumor size >2-5 cm (n=1672)**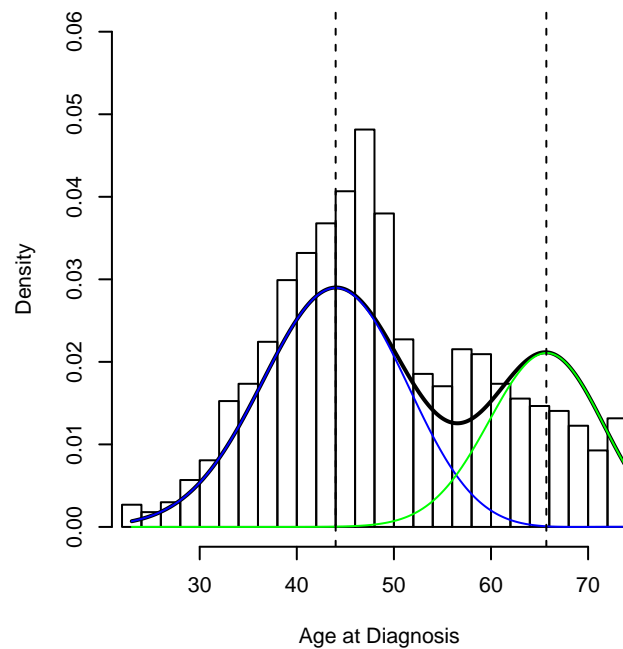**Tumor size >5 cm (n=524)**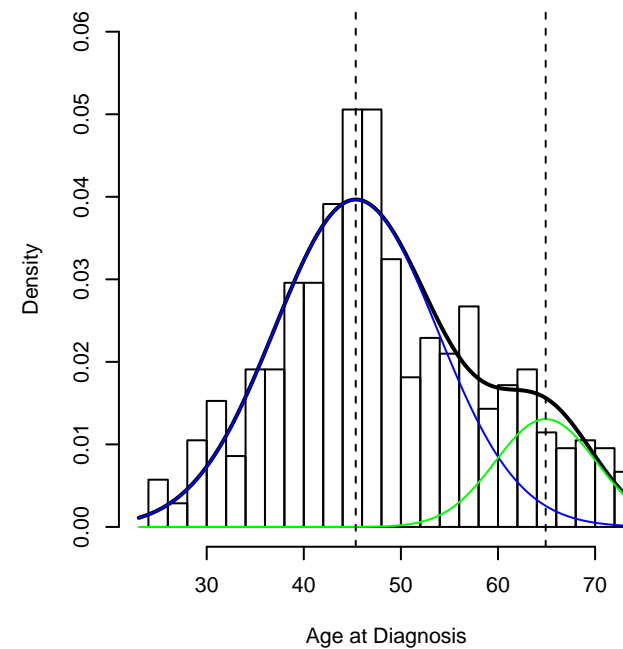**Node negative (n=2901)**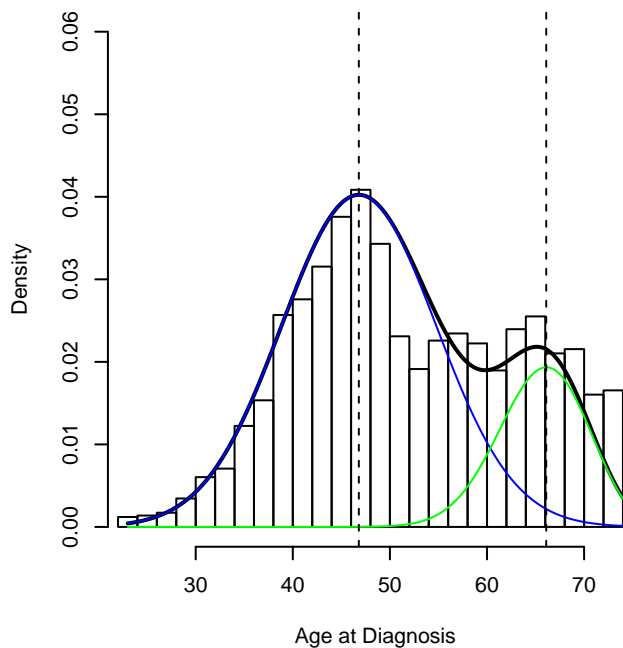**1-2 positive nodes (n=901)**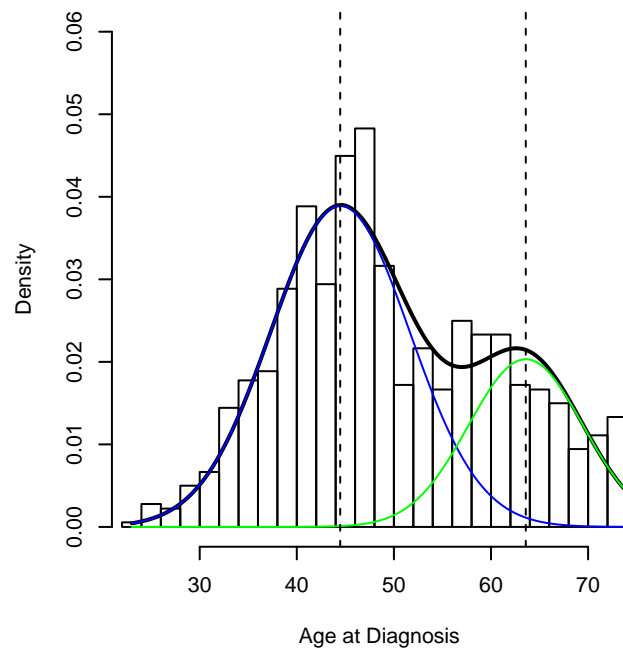**> 2 positive nodes (n=826)**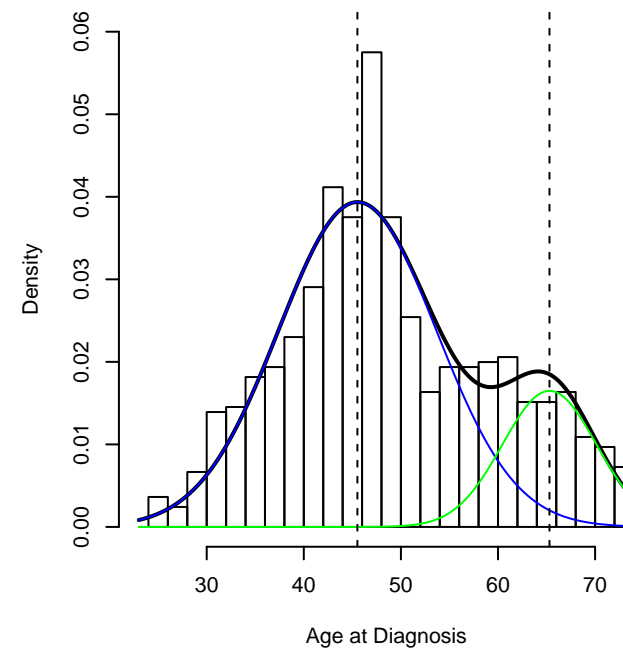

Supplement: MOESM9 [file 17185084]
